# Supplementary material
Source: PubMed Central journal article supplement (PMC4048762)
Supplement: NIHMS585618-supplement-1.pdf [file NIHMS585618-supplement-1.pdf]

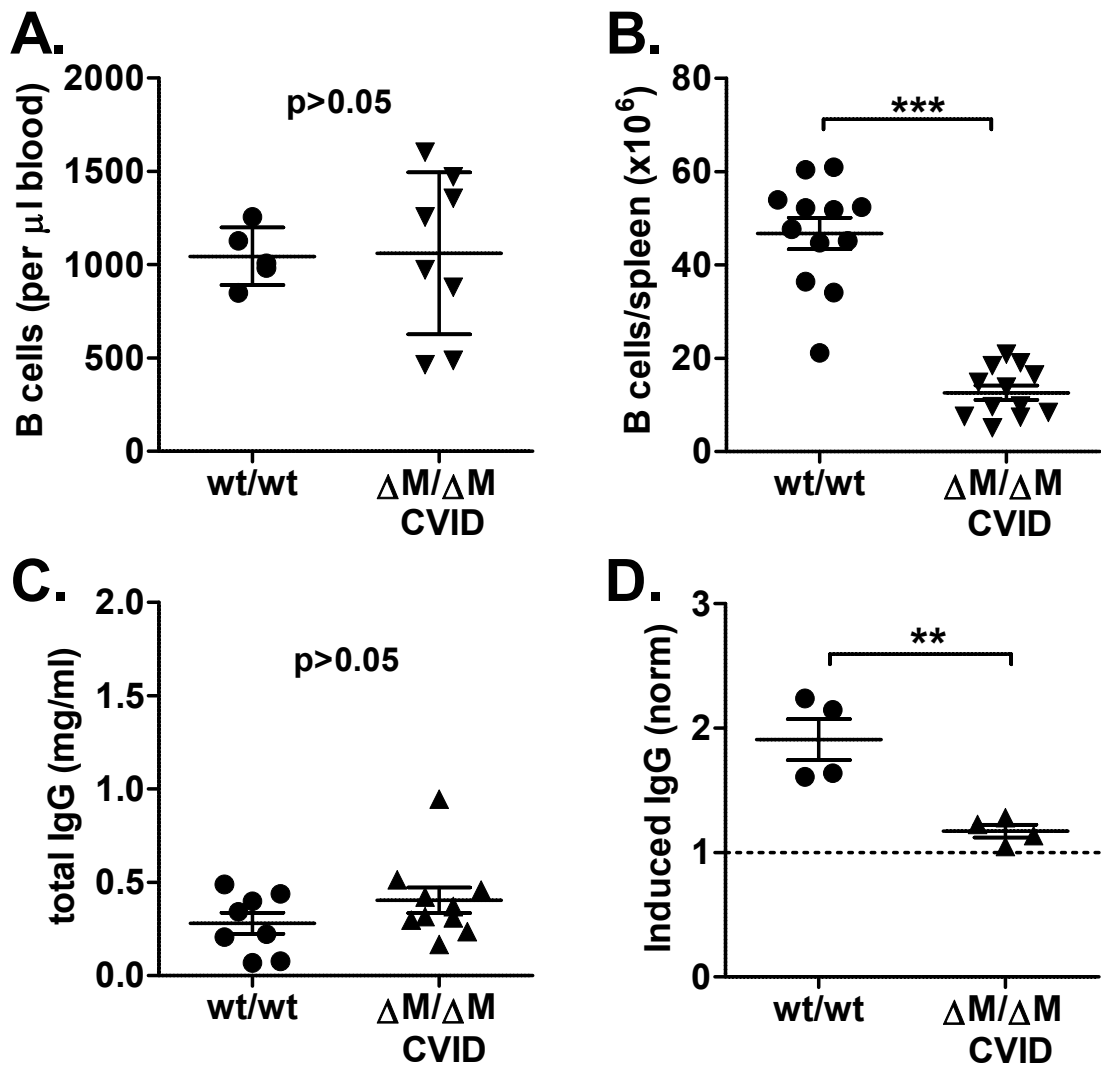

**Supplemental Figure S1. CVID-Mgat2 $\Delta\text{M}/\Delta\text{M}$  mice have reduced splenic B cell counts and exhibit impaired IgG switching in response to microbial stimulation.** Mgat2 $^{\text{wt/wt}}$  or CVID-Mgat2 $\Delta\text{M}/\Delta\text{M}$  mice were used to determine total CD19 $^+$  B cell counts in A) blood and B) spleen. C) Serum concentration of total IgG in non-manipulated mice quantified by ELISA. D) Total IgG induced in Mgat2 $^{\text{wt/wt}}$  or CVID-Mgat2 $\Delta\text{M}/\Delta\text{M}$  mice after i.p. injection of heat-killed cecal contents. Normalized (norm) values reflect the fold increase in total serum IgG in response to microbial stimulation.  $**p < 0.01$ ,  $***p < 0.001$
